# Supplementary material for: Risk Factors for Exercise-Associated Sudden Cardiac Death in Thoroughbred Racehorses
Source: MDPI journal article supplement (doi:10.3390/ani12101297), 2022-05-18
Supplement: s1 [file s1]

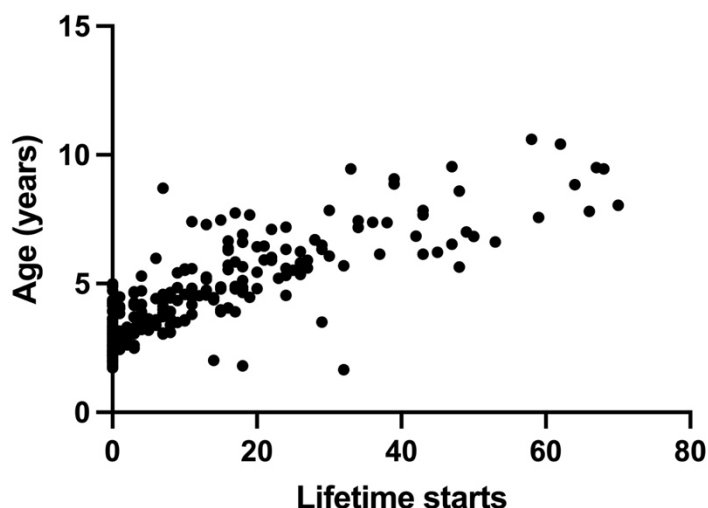

**Figure S1.** Correlation between Age and lifetime starts. Spearman  $r$  0.81, 95%CI 0.76–0.85,  $p < 0.0001$ .

**Table S1.** Pulmonary lesion grade at post-mortem for 34/57 (59.6%) examined SCD horses and 129/188 (67%) examined OFI horses.

| Pulmonary lesion                     | SCD<br><i>n</i> = 34 | OFI<br><i>n</i> = 129 |
|--------------------------------------|----------------------|-----------------------|
| <b>Pulmonary oedema</b>              |                      |                       |
| Grade 0                              | 2 (6%)               | 22 (17%)              |
| Grade 1                              | 6 (18%)              | 34 (26%)              |
| Grade 2                              | 3 (9%)               | 30 (23%)              |
| Grade 3                              | 6 (18%)              | 25 (19%)              |
| Grade 4                              | 18 (53%)             | 17 (13%)              |
| <b>Pulmonary congestion</b>          |                      |                       |
| Grade 0                              | 2 (6%)               | 19 (15%)              |
| Grade 1                              | 3 (9%)               | 28 (22%)              |
| Grade 2                              | 10 (29%)             | 35 (27%)              |
| Grade 3                              | 14 (41%)             | 34 (26%)              |
| Grade 4                              | 6 (18%)              | 13 (10%)              |
| <b>Acute Pulmonary Haemorrhage</b>   |                      |                       |
| Grade 0                              | 4 (12%)              | 59 (46%)              |
| Grade 1                              | 7 (21%)              | 42 (33%)              |
| Grade 2                              | 12 (35%)             | 21 (16%)              |
| Grade 3                              | 6 (18%)              | 3 (2%)                |
| Grade 4                              | 6 (18%)              | 4 (3%)                |
| <b>Chronic Pulmonary Haemorrhage</b> |                      |                       |
| Grade 0                              | 24 (71%)             | 97 (75%)              |
| Grade 1                              | 9 (26%)              | 22 (17%)              |
| Grade 2                              | 1 (3%)               | 6 (5%)                |
| Grade 3                              | 0 (0%)               | 2 (2%)                |
| Grade 4                              | 1 (3%)               | 2 (2%)                |

**Table S2.** Multiple logistic regression of relationship between each included variable and SCD with age retained.

| Variable                 | SCD<br><i>n</i> = 57 | OFI<br><i>n</i> = 188 | $\beta$ coeff | Log odds<br>ratio | OR<br>95% CI | <i>p</i> value |
|--------------------------|----------------------|-----------------------|---------------|-------------------|--------------|----------------|
| Continuous, median (IQR) |                      |                       |               |                   |              |                |

| Categorical, proportion<br>(%[95% CI]) |                  |                  |       |      |           |      |
|----------------------------------------|------------------|------------------|-------|------|-----------|------|
| Sex                                    |                  |                  |       |      |           |      |
| Gelding (REF)                          | 27 (47[35–60]%)  | 94 (50[43–57]%)  |       |      |           |      |
| Female                                 | 21 (37[25–50]%)  | 48 (25[10–32]%)  | –0.03 | 0.97 | 0.45–2.05 | 0.93 |
| Entire male                            | 9 (16[8–28]%)    | 46 (25[19–31]%)  | 0.96  | 0.39 | 0.15–0.96 | 0.05 |
| Sire hemisphere of origin              |                  |                  |       |      |           |      |
| Southern hemi (REF)                    | 35 (65[51–76]%)  | 97 (52[45–69]%)  |       |      |           |      |
| Northern hemi                          | 19 (35[24–49]%)  | 89 (48[41–55]%)  | –0.31 | 0.73 | 0.37–1.40 | 0.35 |
| Exercise type                          |                  |                  |       |      |           |      |
| Racing (REF)                           | 15 (26[17–39]%)  | 106 (56[49–63]%) |       |      |           |      |
| Training                               | 42 (74[63–81]%)  | 82 (44[37–51]%)  | 0.96  | 2.61 | 1.25–5.66 | 0.01 |
| Lifetime starts                        | 3 (0–9.0)        | 9 (0–22.8)       | –0.05 | 0.95 | 0.90–0.99 | 0.04 |
| Age                                    | 3.58 (3.05–4.36) | 4.5 (3.12–6.02)  | 0.09  | 1.10 | 0.78–1.55 | 0.59 |

Tjur's  $r^2 = 0.11$ , area under ROC curve (95%CI) = 0.73 (0.66–0.80),  $p < 0.0001$ . Hosmer-Lemeshow statistic 12.75,  $p = 0.12$ .

**Table S3.** Multiple logistic regression of relationship between each included variable and SCD with lifetime starts discarded.

| Variable<br>Continuous, median (IQR)<br>Categorical, proportion<br>(%[95% CI]) | SCD<br>$n = 57$  | OFI<br>$n = 188$ | $\beta$ coeff | Log odds<br>ratio | OR<br>95% CI | $p$ value |
|--------------------------------------------------------------------------------|------------------|------------------|---------------|-------------------|--------------|-----------|
| Sex                                                                            |                  |                  |               |                   |              |           |
| Gelding (REF)                                                                  | 27 (47[35–60]%)  | 94 (50[43–57]%)  |               |                   |              |           |
| Female                                                                         | 21 (37[25–50]%)  | 48 (25[10–32]%)  | 0.15          | 1.16              | 0.56–1.46    | 0.68      |
| Entire male                                                                    | 9 (16[8–28]%)    | 46 (25[19–31]%)  | –0.91         | 0.40              | 0.15–0.99    | 0.06      |
| Sire hemisphere of origin                                                      |                  |                  |               |                   |              |           |
| Southern hemi (REF)                                                            | 35 (65[51–76]%)  | 97 (52[45–69]%)  |               |                   |              |           |
| Northern hemi                                                                  | 19 (35[24–49]%)  | 89 (48[41–55]%)  | –0.27         | 0.76              | 0.39–1.46    | 0.42      |
| Exercise type                                                                  |                  |                  |               |                   |              |           |
| Racing (REF)                                                                   | 15 (26[17–39]%)  | 106 (56[49–63]%) |               |                   |              |           |
| Training                                                                       | 42 (74[63–81]%)  | 82 (44[37–51]%)  | 1.12          | 3.05              | 1.50–6.45    | <0.01     |
| Age                                                                            | 3.58 (3.05–4.36) | 4.5 (3.12–6.02)  | –0.18         | 0.84              | 0.66–1.04    | 0.12      |

Tjur's  $r^2 = 0.10$ , area under ROC curve (95%CI) = 0.73 (0.66–0.80),  $p < 0.0001$ . Hosmer-Lemeshow statistic 11.98,  $p = 0.15$ .
